# Supplementary material for: A BOPHY based fluorescent probe for Hg2+via NTe2 chelation
Source: Royal Society of Chemistry journal article supplement (doi:10.1039/d2dt01086k), 2022-01-01
Supplement: d2dt01086k1.pdf [file d2dt01086k1.pdf]

## Supporting Information

### **BOPHY based Fluorescent Probe for Hg<sup>2+</sup> via an NTe<sub>2</sub> Chelation**

Gauri S. Malankar<sup>a</sup>, Divyesh S. Shelar<sup>a</sup>, Manikandan M.<sup>b</sup>, Malay Patra<sup>b\*</sup>, Ray J. Butcher<sup>c</sup>,  
Sudesh T. Manjare<sup>a\*</sup>

<sup>a</sup>Department of Chemistry, University of Mumbai, Mumbai, 400098, India

<sup>b</sup>Department of Chemical Science, Tata Institute of Fundamental Research, Mumbai, 400005,  
India

<sup>c</sup>Howard University, Washington DC, USA

### **Corresponding Author**

\* Email ids: [sudeshmanjare@chemistry.mu.ac.in](mailto:sudeshmanjare@chemistry.mu.ac.in), [malay.patra@tifr.res.in](mailto:malay.patra@tifr.res.in)

## TABLE OF CONTENTS

| SR. NO. | DESCRIPTION                                                                   | PAGE NO. |
|---------|-------------------------------------------------------------------------------|----------|
| 1       | Synthesis                                                                     | 2        |
| 2       | NMR ( $^1\text{H}$ , $^{13}\text{C}$ , $^{125}\text{Te}$ ) spectra of probe 3 | 3-4      |
| 3       | Mass spectrum of probe 3                                                      | 4        |
| 4       | Refinement details of X-ray structure of probe 3                              | 5        |
| 5       | Photophysical spectra of probe 3                                              | 6-11     |
| 6       | $^1\text{H}$ and mass spectra of compound 4                                   | 11-12    |
| 7       | Cell viability assay of probe 3                                               | 12       |
| 8       | Fluorescence intensity quantification of probe 3                              | 13       |

## Synthesis

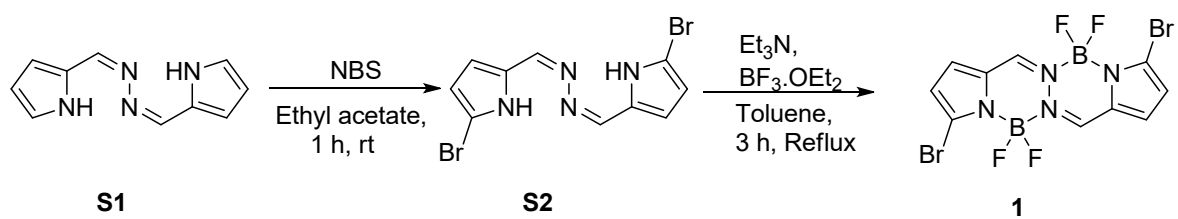

**Scheme S1.** Synthesis of compound **1**.

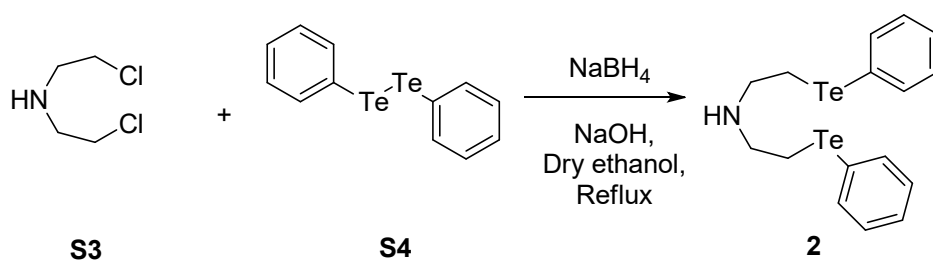

**Scheme S2.** Synthesis of compound **2**.

## Characterization data

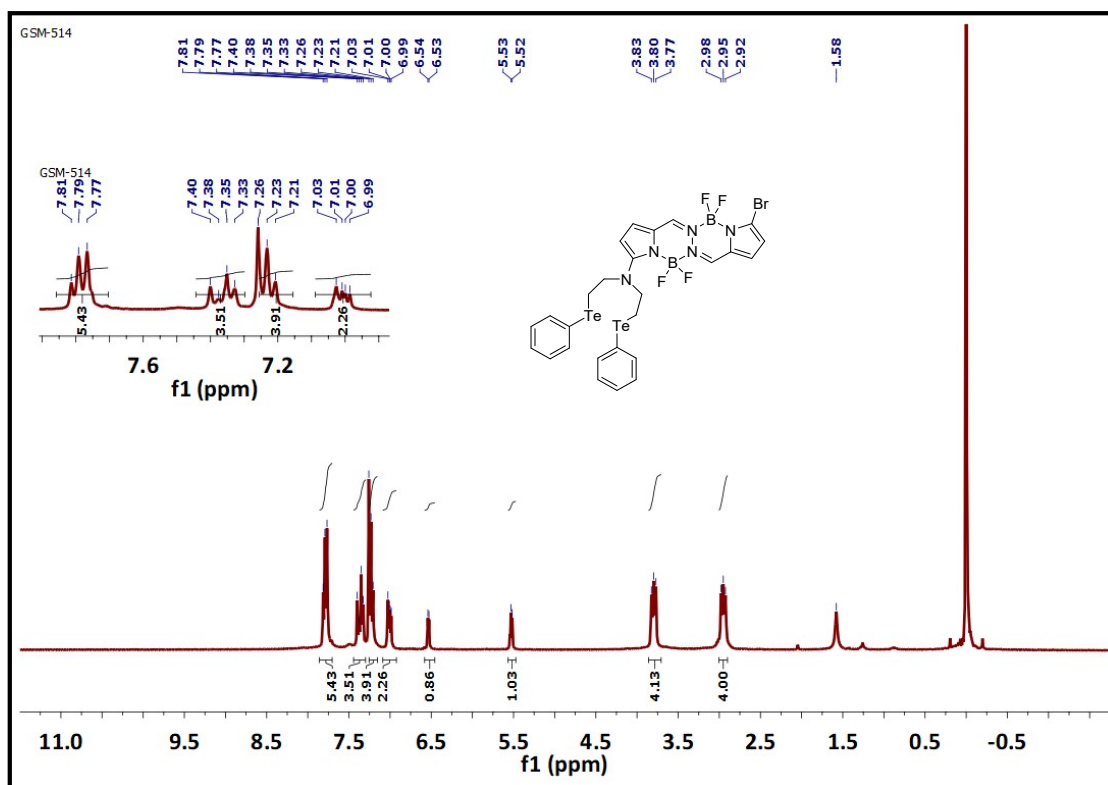

Fig. S1.  $^1\text{H}$  NMR spectrum of probe 3 in  $\text{CDCl}_3$ .

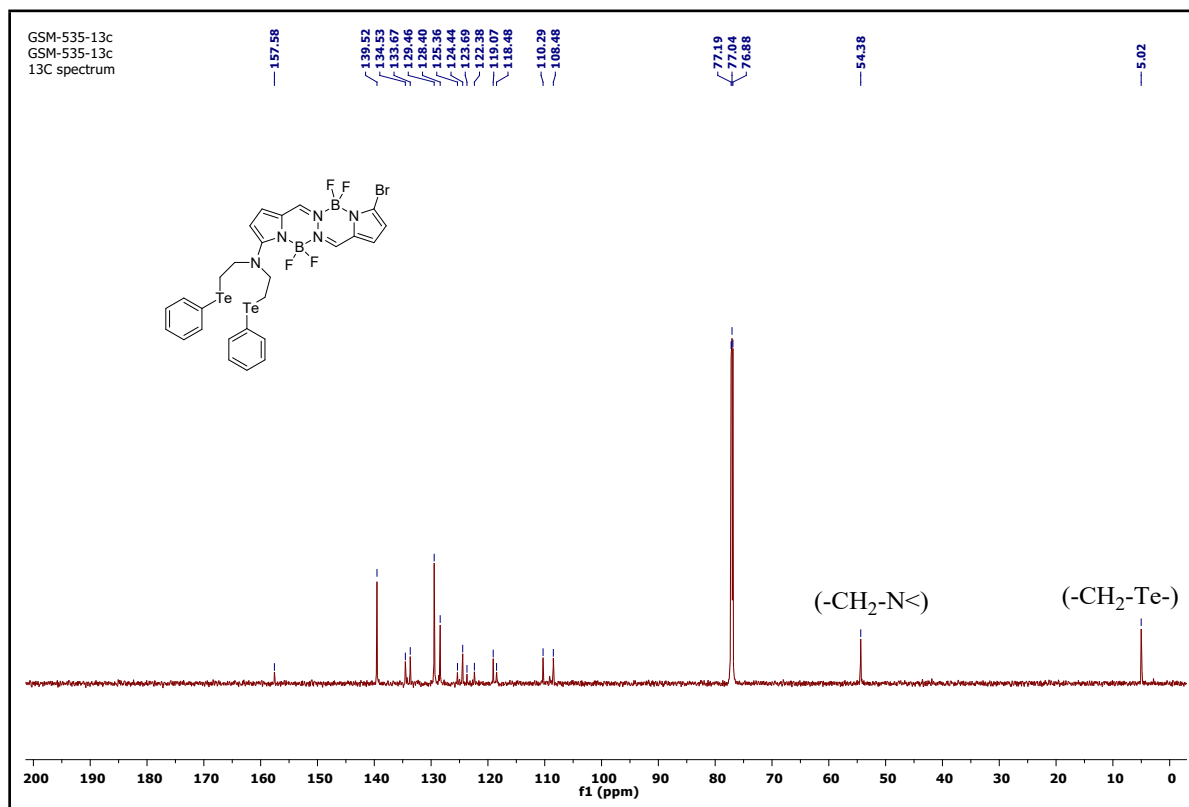

Fig. S2.  $^{13}\text{C}$  NMR spectrum of probe 3 in  $\text{CDCl}_3$ .

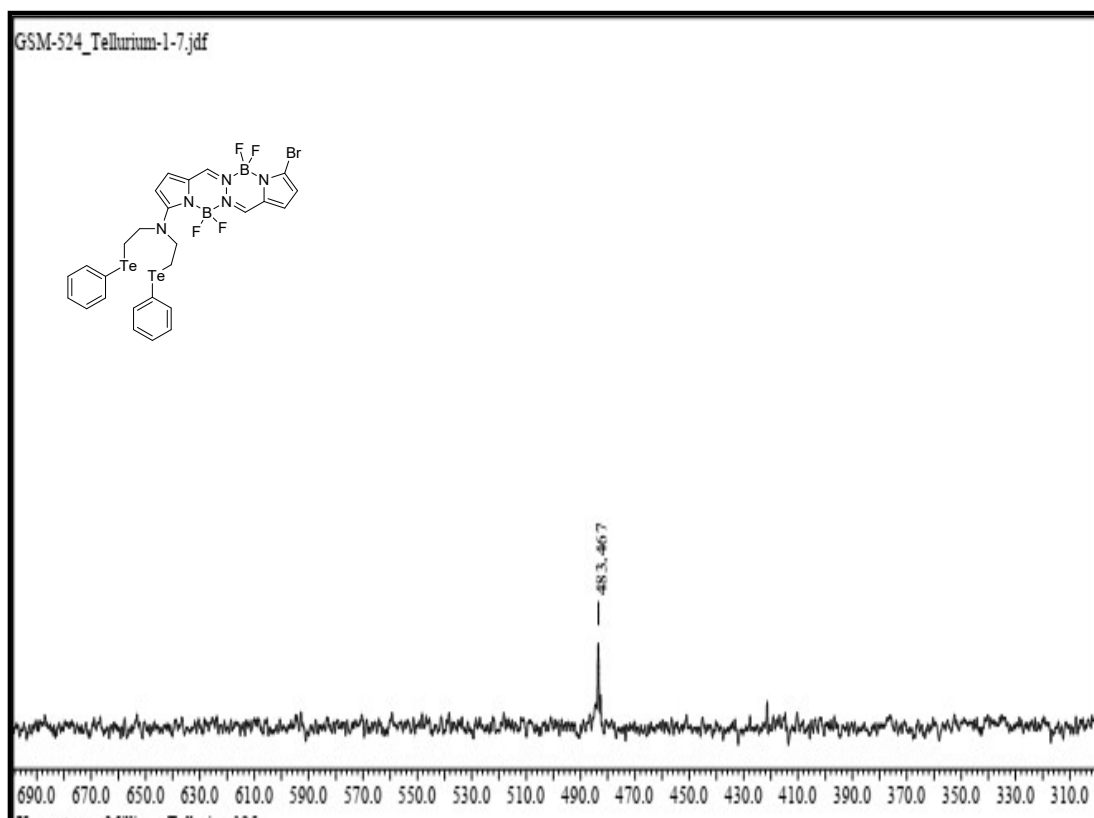

Fig. S3.  $^{125}\text{Te}$  NMR spectrum of probe 3 in  $\text{CDCl}_3$ .

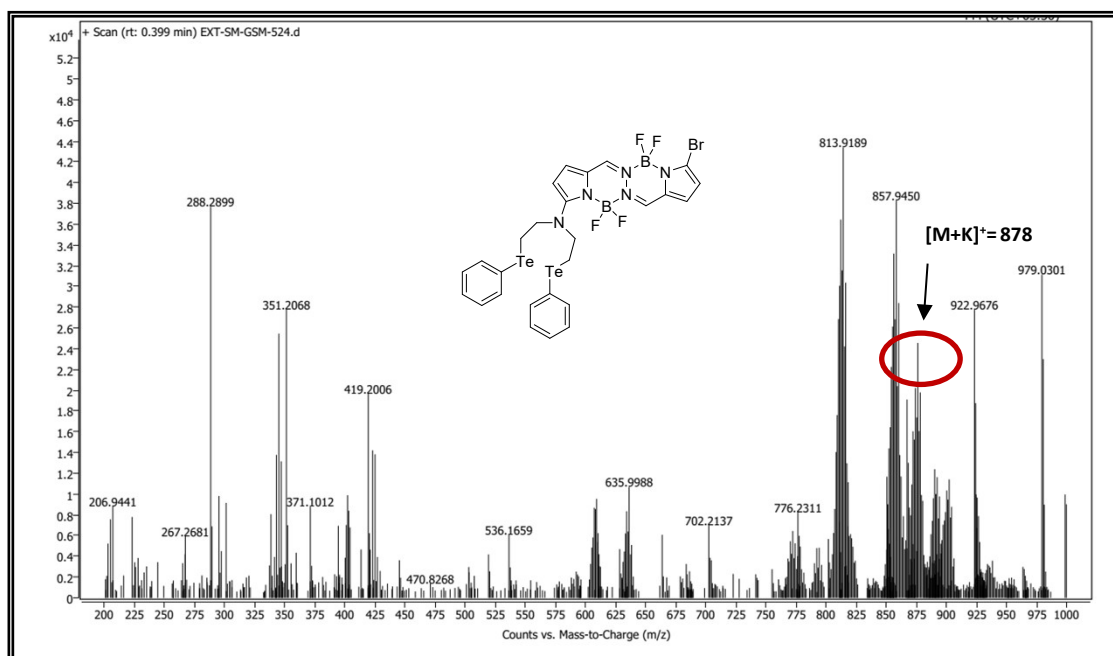

Fig. S4. Mass spectrum of probe 3.

**Table S1.** Refinement details of X-ray structure of probe 3.

| <b>Compound</b>                                 | <b>Probe 3 (CCDC# 2150059)</b>                                                                                     |
|-------------------------------------------------|--------------------------------------------------------------------------------------------------------------------|
| <b>Formula</b>                                  | C <sub>26</sub> H <sub>23.77</sub> B <sub>2</sub> Br <sub>1.23</sub> F <sub>4</sub> N <sub>5</sub> Te <sub>2</sub> |
| <b>Crystal System</b>                           | Triclinic                                                                                                          |
| <b>Space Group</b>                              | P -1                                                                                                               |
| <b>T/K</b>                                      | 100(2)                                                                                                             |
| <b>a [ Å<sup>0</sup>]</b>                       | 12.0491(9)                                                                                                         |
| <b>b [ Å<sup>0</sup>]</b>                       | 12.3467(9)                                                                                                         |
| <b>c [ Å<sup>0</sup>]</b>                       | 12.4561(9)                                                                                                         |
| <b>α [°]</b>                                    | 61.172(3)                                                                                                          |
| <b>β [°]</b>                                    | 62.951(2)                                                                                                          |
| <b>γ [°]</b>                                    | 81.418(3)                                                                                                          |
| <b>V [Å<sup>3</sup>]</b>                        | 1440.00(19)                                                                                                        |
| <b>Z</b>                                        | 2                                                                                                                  |
| <b>ρ<sub>cal</sub>Mg/m<sup>3</sup></b>          | 1.978                                                                                                              |
| <b>μ(mm<sup>-1</sup>)</b>                       | 3.788                                                                                                              |
| <b>F(000)</b>                                   | 816                                                                                                                |
| <b>Crystal Size [mm<sup>3</sup>]</b>            | 0.23 x 0.16 x 0.11                                                                                                 |
| <b>GOF</b>                                      | 1.044                                                                                                              |
| <b>2θ range (deg)</b>                           | 1.905 to 26.372                                                                                                    |
| <b>Reflections collected</b>                    | 5885                                                                                                               |
| <b>Independent reflections</b>                  | 5885                                                                                                               |
| <b>Parameters</b>                               | 371                                                                                                                |
| <b>R<sub>int</sub></b>                          | 0.1410                                                                                                             |
| <b>R<sub>1</sub>,wR<sub>2</sub>[I&gt;2σ(I)]</b> | R1 = 0.0523, wR2 = 0.1174                                                                                          |
| <b>R<sub>1</sub>,wR<sub>2</sub>[I&gt;2σ(I)]</b> | R1 = 0.0072, wR2 = 0.1287                                                                                          |

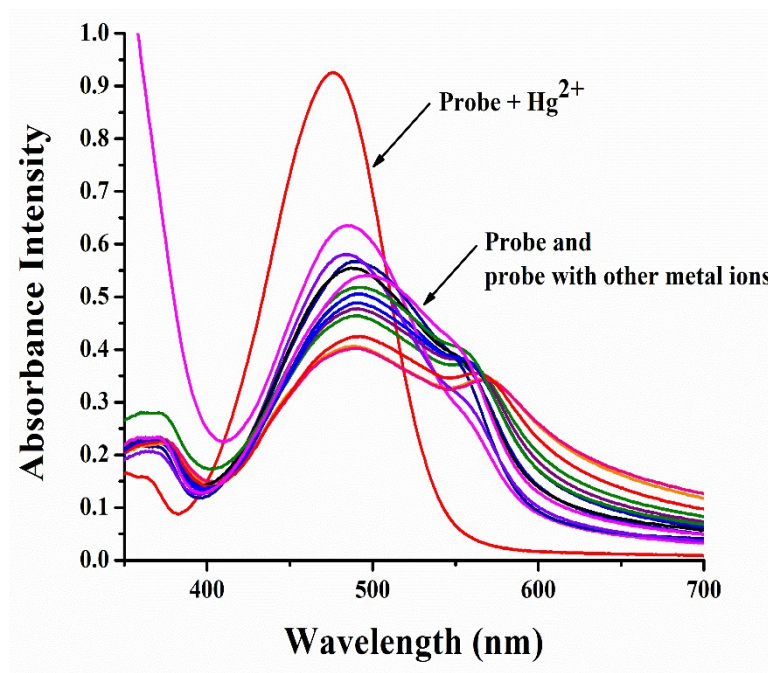

**Fig. S5.** Absorption spectra of probe **3** (20  $\mu\text{M}$ ) with metal ions ( $\text{Hg}^{2+}$ ,  $\text{Hg}^+$ ,  $\text{Cu}^{2+}$ ,  $\text{Ca}^{2+}$ ,  $\text{Na}^+$ ,  $\text{Co}^{2+}$ ,  $\text{K}^+$ ,  $\text{Zn}^{2+}$ ,  $\text{Al}^{3+}$ ,  $\text{Fe}^{2+}$ ,  $\text{Cd}^{2+}$ ,  $\text{Mn}^{2+}$ ,  $\text{Ag}^+$ ,  $\text{Fe}^{3+}$ ,  $\text{Pb}^{2+}$ ,  $\text{Hg}^+$ ,  $\text{Cu}^+$ , 6 equiv) in the solution (DMSO/water, 1:1 v/v) incubated for 20 min at rt.

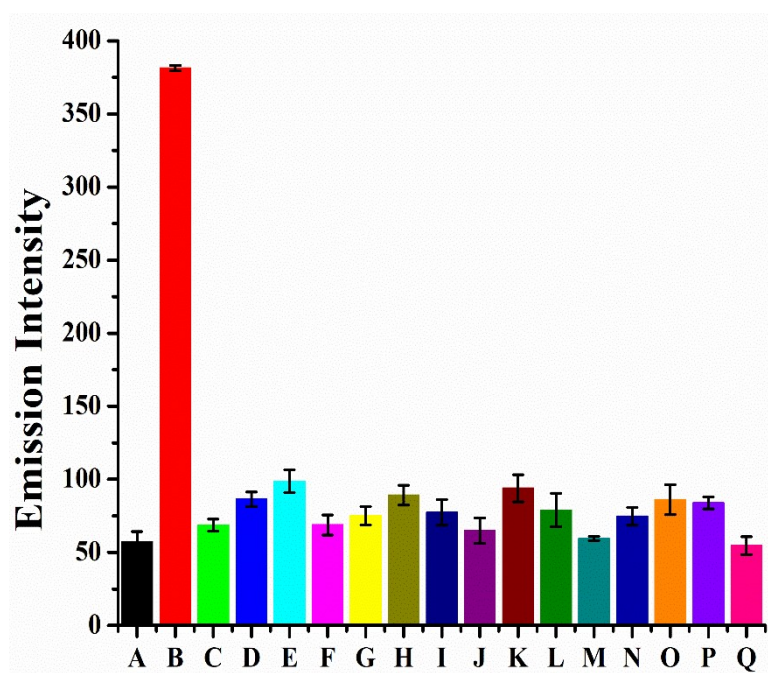

**Fig. S6.** Selectivity study bar graph for emission of probe **3** (20  $\mu\text{M}$ ) with metal ions ( $\text{Hg}^{2+}$ ,  $\text{Cu}^{2+}$ ,  $\text{Ca}^{2+}$ ,  $\text{Na}^+$ ,  $\text{Co}^{2+}$ ,  $\text{K}^+$ ,  $\text{Zn}^{2+}$ ,  $\text{Al}^{3+}$ ,  $\text{Fe}^{2+}$ ,  $\text{Cd}^{2+}$ ,  $\text{Mn}^{2+}$ ,  $\text{Ag}^+$ ,  $\text{Fe}^{3+}$ ,  $\text{Pb}^{2+}$ ,  $\text{Cu}^+$ , 6 equiv). (A = probe **3**, B = probe **3** +  $\text{Hg}^{2+}$ , C = probe **3** +  $\text{Cu}^{2+}$ , D = probe **3** +  $\text{Ca}^{2+}$ , E = probe **3** +  $\text{Na}^+$ , F = probe **3** +  $\text{Co}^{2+}$ , G = probe **3** +  $\text{K}^+$ , H = probe **3** +  $\text{Zn}^{2+}$ , I = probe **3** +  $\text{Al}^{3+}$ , J = probe **3** +  $\text{Fe}^{2+}$ ,

K = probe **3** + Cd<sup>2+</sup>, L = probe **3** + Mn<sup>2+</sup>, M = probe **3** + Ag<sup>+</sup>, N = probe **3** + Fe<sup>3+</sup>, O = probe **3** + Pb<sup>2+</sup>, P = probe **3** + Hg<sup>+</sup>, Q = probe **3** + Cu<sup>+</sup> in the solution (DMSO/water, 1:1 v/v) incubated for 20 min.  $\lambda_{\text{ex}} = 486 \text{ nm}$ ,  $\lambda_{\text{em}} = 547 \text{ nm}$ , slit width 5 nm/5 nm.

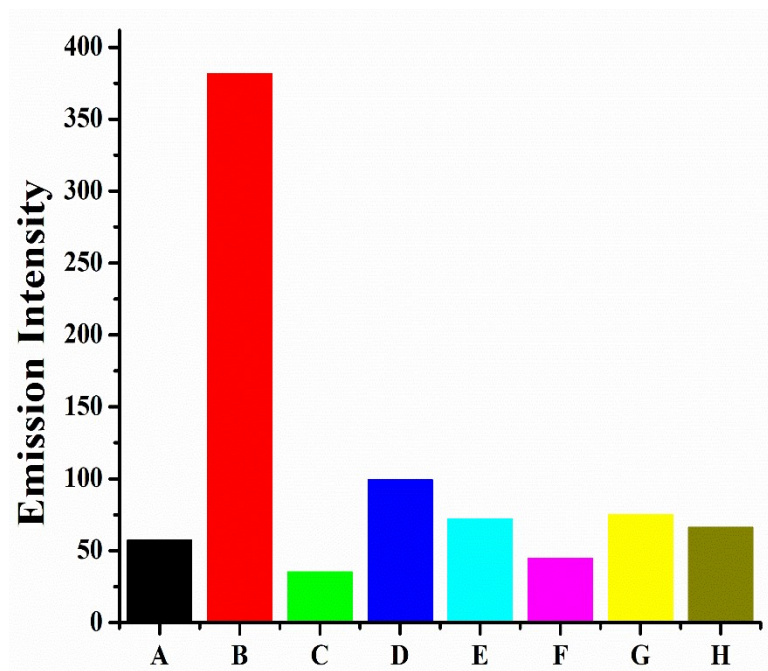

**Fig. S7.** Selectivity study bar graph for emission of probe **3** (20  $\mu\text{M}$ ) with ROS ( $\text{O}_2^-$ ,  $\text{H}_2\text{O}_2$ ,  $\text{NaOCl}$ ,  $t\text{BuO}_2\text{H}$ ,  $\cdot\text{OH}$ ,  $t\text{BuO}\cdot$ , 6 equiv). (A = probe **3**, B = probe **3** +  $\text{Hg}^{2+}$ , C = probe **3** +  $\text{O}_2^-$ , D = probe **3** +  $\text{H}_2\text{O}_2$ , E = probe **3** +  $\text{NaOCl}$ , F = probe **3** +  $t\text{BuO}_2\text{H}$ , G = probe **3** +  $\cdot\text{OH}$ , H = probe **3** +  $t\text{BuO}\cdot$ ) in the solution (DMSO/water, 1:1 v/v) incubated for 20 min.  $\lambda_{\text{ex}} = 486 \text{ nm}$ ,  $\lambda_{\text{em}} = 547 \text{ nm}$ , slit width 5 nm/5 nm.



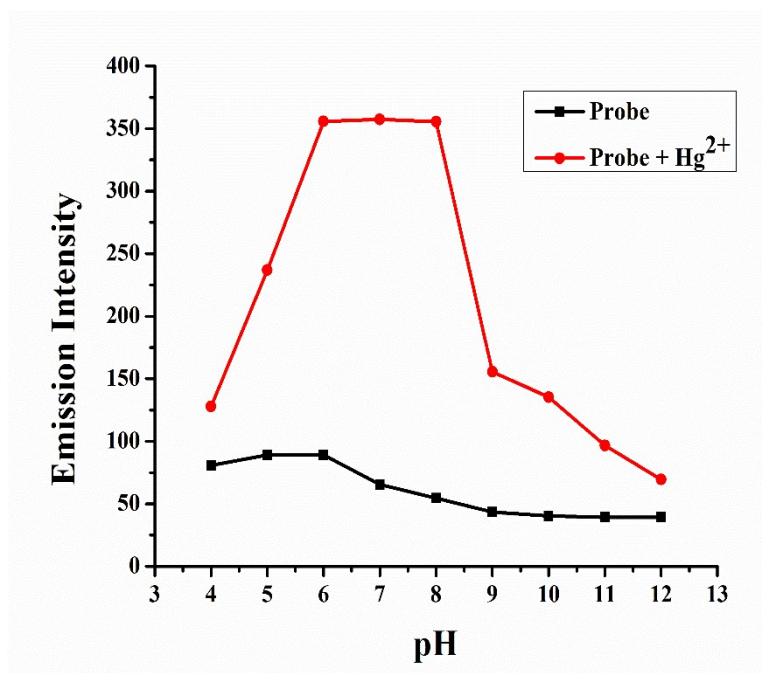

**Fig. S8.** Fluorescence intensity change of probe **3** (20  $\mu\text{M}$ , black) and probe (20  $\mu\text{M}$ ) with 6 equiv of  $\text{Hg}^{2+}$  (red), in the solution (DMSO/1 mM PBS, 1:1 v/v) incubated for 20 min.  $\lambda_{\text{ex}} = 486 \text{ nm}$ ,  $\lambda_{\text{em}} = 547 \text{ nm}$ , slit width 5 nm/5 nm, under different pH range.

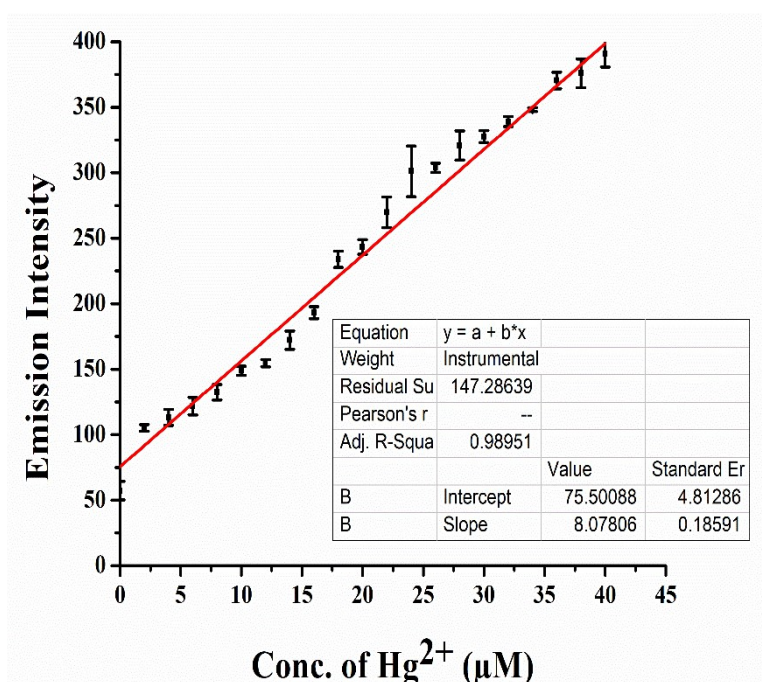

**Fig. S9.** Plot for the calculation of limit of detection from the emission of probe **3** (20  $\mu\text{M}$ , DMSO/water, 1:1 v/v) with increasing concentration of  $\text{Hg}^{2+}$  (0 to 2 equiv) incubated for 20 min at rt.  $\lambda_{\text{ex}} = 486 \text{ nm}$ ,  $\lambda_{\text{em}} = 547 \text{ nm}$ , slit width 5 nm/5 nm (average of three experiments).

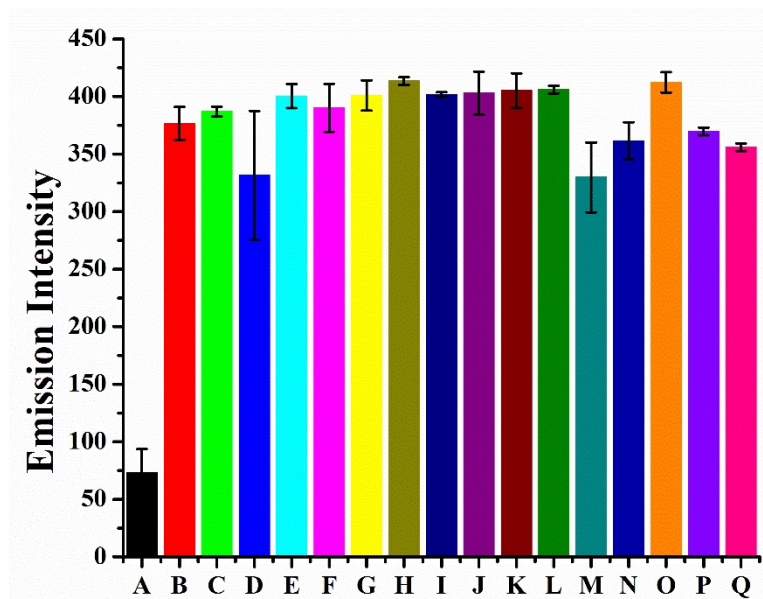

**Fig. S10.** Fluorescence intensity of probe **3** (20  $\mu\text{M}$ ) and  $\text{Hg}^{2+}$  (6 equiv) with metal ions ( $\text{Hg}^{2+}$ ,  $\text{Cu}^{2+}$ ,  $\text{Ca}^{2+}$ ,  $\text{Na}^{+}$ ,  $\text{Co}^{2+}$ ,  $\text{K}^{+}$ ,  $\text{Zn}^{2+}$ ,  $\text{Al}^{3+}$ ,  $\text{Fe}^{2+}$ ,  $\text{Cd}^{2+}$ ,  $\text{Mn}^{2+}$ ,  $\text{Ag}^{+}$ ,  $\text{Fe}^{3+}$ ,  $\text{Pb}^{2+}$ , 6 equiv). (A = probe **3**, B = probe **3** +  $\text{Hg}^{2+}$ , C = probe **3** +  $\text{Hg}^{2+}$  +  $\text{Cu}^{2+}$ , D = probe **3** +  $\text{Hg}^{2+}$  +  $\text{Ca}^{2+}$ , E = probe **3** +  $\text{Hg}^{2+}$  +  $\text{Na}^{+}$ , F = probe **3** +  $\text{Hg}^{2+}$  +  $\text{Co}^{2+}$ , G = probe **3** +  $\text{Hg}^{2+}$  +  $\text{K}^{+}$ , H = probe **3** +  $\text{Hg}^{2+}$  +  $\text{Zn}^{2+}$ , I = probe **3** +  $\text{Hg}^{2+}$  +  $\text{Al}^{3+}$ , J = probe **3** +  $\text{Hg}^{2+}$  +  $\text{Fe}^{2+}$ , K = probe **3** +  $\text{Hg}^{2+}$  +  $\text{Cd}^{2+}$ , L = probe **3** +  $\text{Hg}^{2+}$  +  $\text{Mn}^{2+}$ , M = probe **3** +  $\text{Hg}^{2+}$  +  $\text{Ag}^{+}$ , N = probe **3** +  $\text{Hg}^{2+}$  +  $\text{Fe}^{3+}$ , O = probe **3** +  $\text{Hg}^{2+}$  +  $\text{Pb}^{2+}$ , P = probe **3** +  $\text{Hg}^{2+}$  +  $\text{Hg}^{+}$ , Q = probe **3** +  $\text{Hg}^{2+}$  +  $\text{Cu}^{+}$ ) in solution (DMSO/water, 1:1 v/v) incubated for 20 min.  $\lambda_{\text{ex}} = 486 \text{ nm}$ ,  $\lambda_{\text{em}} = 547 \text{ nm}$ , slit width 5 nm/5 nm.

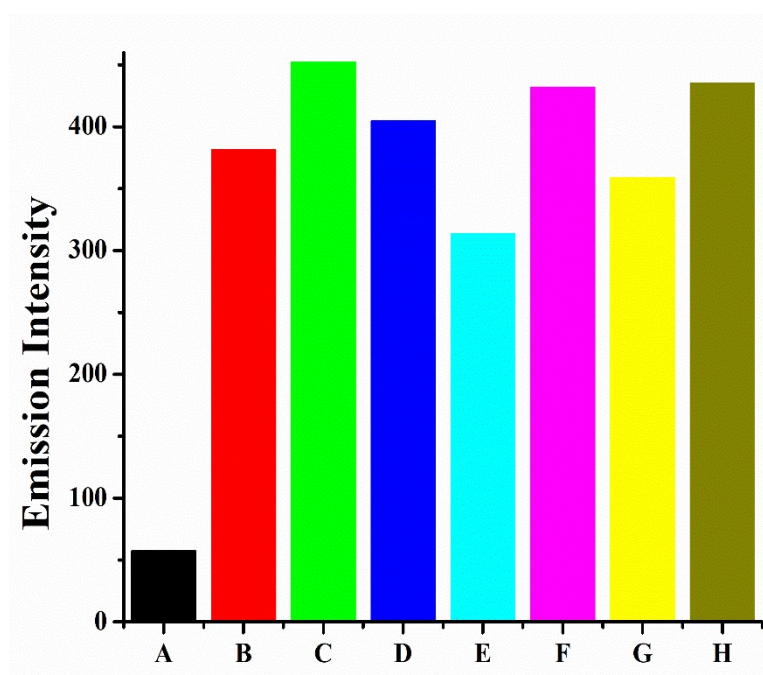

**Fig. S11.** Fluorescence intensity of probe **3** (20  $\mu\text{M}$ ) and  $\text{Hg}^{2+}$  (6 equiv) with ROS ( $\text{O}_2^-$ ,  $\text{H}_2\text{O}_2$ ,  $\text{NaOCl}$ ,  $t\text{BuO}_2\text{H}$ ,  $\cdot\text{OH}$ ,  $t\text{BuO}\cdot$ , 6 equiv). (A = probe **3**, B = probe **3** +  $\text{Hg}^{2+}$ , C = probe **3** +  $\text{Hg}^{2+}$  +  $\text{O}_2^-$ , D = probe **3** +  $\text{Hg}^{2+}$  +  $\text{H}_2\text{O}_2$ , E = probe **3** +  $\text{Hg}^{2+}$  +  $\text{NaOCl}$ , F = probe **3** +  $\text{Hg}^{2+}$  +  $t\text{BuO}_2\text{H}$ , G = probe **3** +  $\text{Hg}^{2+}$  +  $\cdot\text{OH}$ , H = probe **3** +  $\text{Hg}^{2+}$  +  $t\text{BuO}\cdot$ ) in solution (DMSO/water, 1:1 v/v) incubated for 20 min.  $\lambda_{\text{ex}} = 486 \text{ nm}$ ,  $\lambda_{\text{em}} = 547 \text{ nm}$ , slit width 5 nm/5 nm.

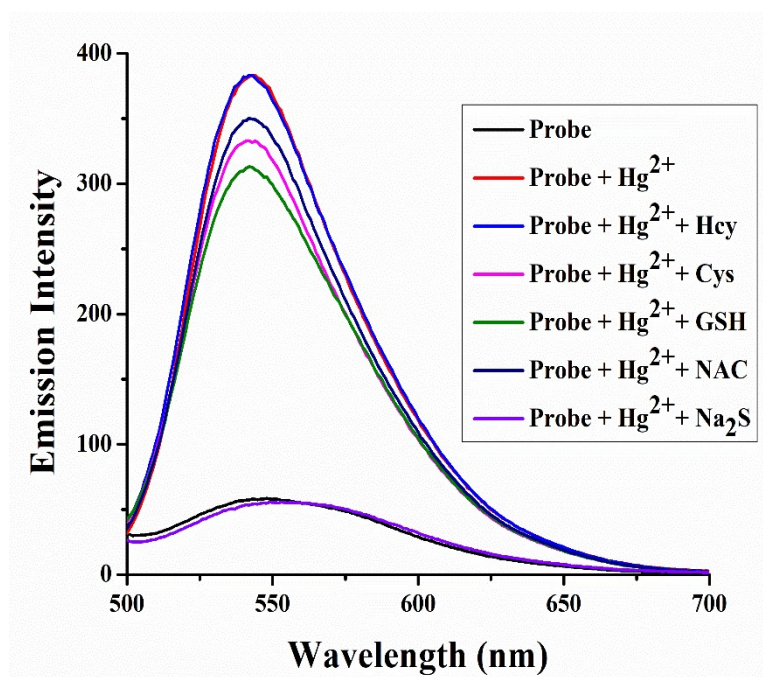

**Fig. S12.** Fluorescence response of probe **3** (20  $\mu\text{M}$ ) with  $\text{Hg}^{2+}$  (6 equiv) in solution (DMSO/water, 1:1, v/v) incubated for 20 min and after addition of biothiols (DL-homocysteine, L-cysteine, glutathione, N-acetyl-L-cysteine,  $\text{Na}_2\text{S}$ , 6 equiv) incubated for 30 min at rt,  $\lambda_{\text{ex}} = 486 \text{ nm}$ ,  $\lambda_{\text{em}} = 547 \text{ nm}$ , slit width 5 nm/5 nm.

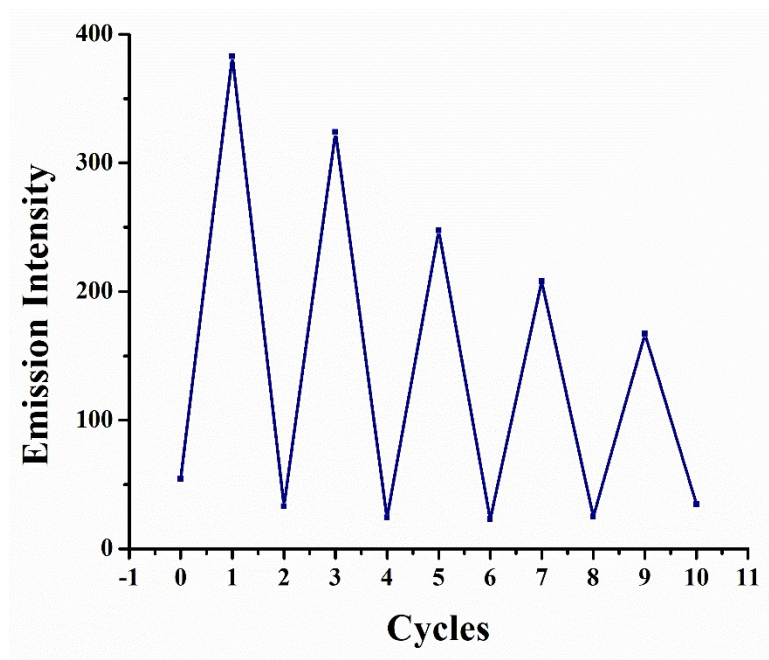

**Fig. S13.** Redox cycles of probe **3** (20  $\mu\text{M}$ ) with 6 equiv of  $\text{Hg}^{2+}$  and  $\text{Na}_2\text{S}$  in solution (DMSO/water, 1:1, v/v)  $\lambda_{\text{ex}} = 486 \text{ nm}$ ,  $\lambda_{\text{em}} = 547 \text{ nm}$ , slit width 5 nm/5 nm.

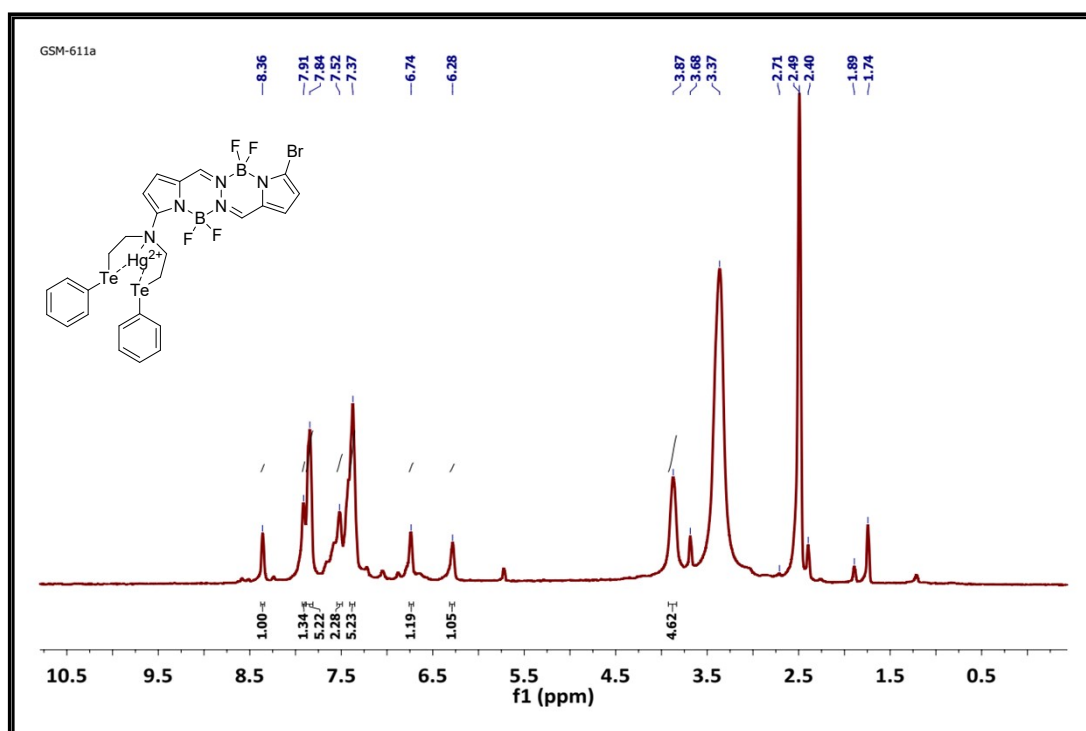

**Fig. S14.**  $^1\text{H}$  NMR spectrum of compound **4** in  $\text{DMSO-d}_6$ .

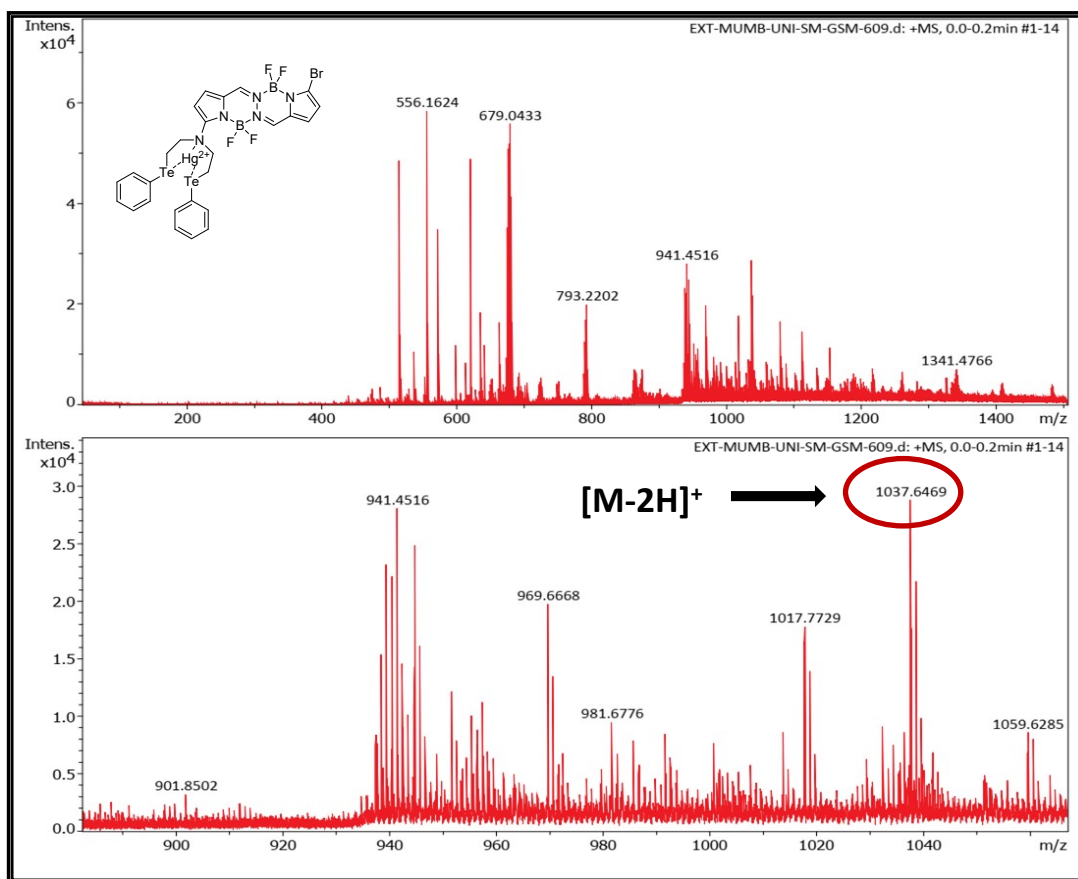

**Fig. S15.** Mass spectrum of compound 4.

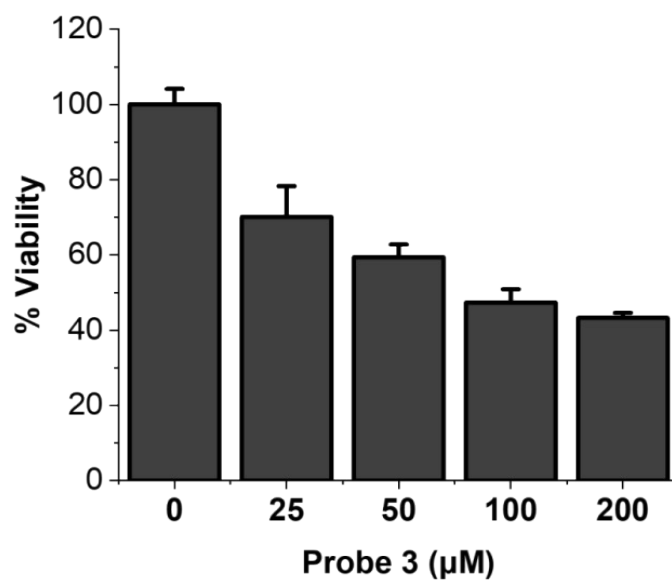

**Fig. S16.** Concentration-dependent cell viability assay of probe 3 in HeLa cells for 1 h.

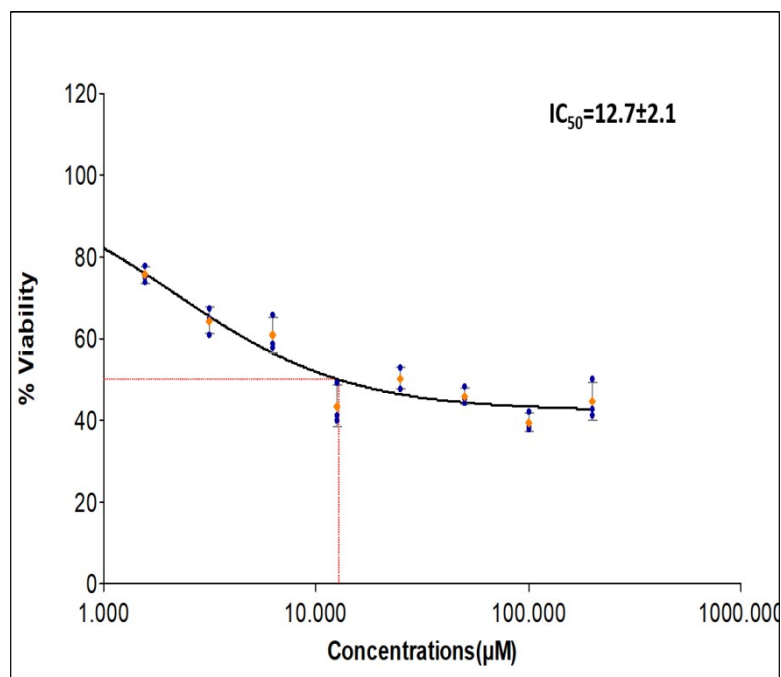

**Fig. S17.** Concentration-dependent cell viability assay of probe **3** in HeLa cells for 24 h.

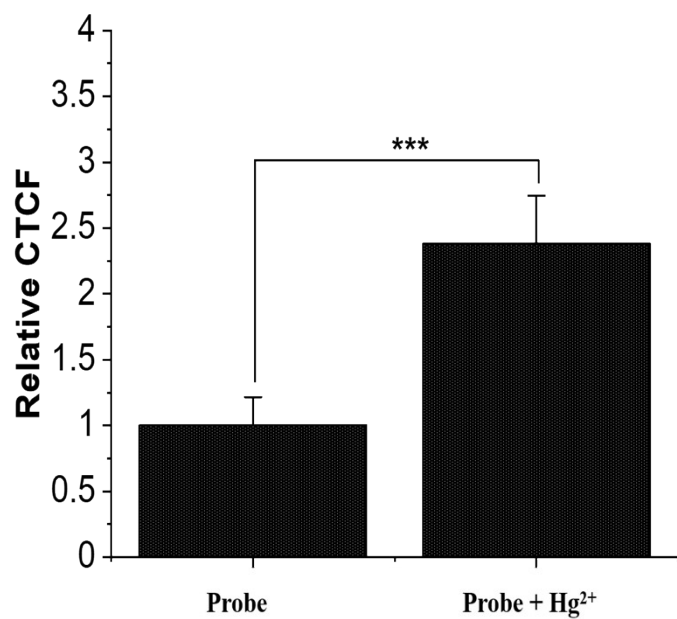

**Fig. S18.** Fluorescence intensity quantification of probe **3**.
